# Supplementary material for: Structure of the human C9orf72-SMCR8 complex reveals a multivalent protein interaction architecture
Source: PLoS Biol. 2021 Jul 23;19(7):e3001344. doi: 10.1371/journal.pbio.3001344 (PMC8336837; doi:10.1371/journal.pbio.3001344)
Supplement: S2 Data — (XLSX) [file pbio.3001344.s013.xlsx]

## Sheet: Fig 5D
S2 Data: Quantification of SMCR8, C9orf72, WDR41 and FIP200 proteins by mass spectrometry used for Fig 5D, E and S10 Fig.
1. LFQ intensities
Samples	SMCR8	Condition	Gene
			SMCR8	C9orf72	FIP200	WDR41
1	WT	Fed	74336000000	22896000000	39691000	398800000
2	WT	Fed	34842000000	5253600000	35558000	59330000
3	WT	Fed	40952000000	6470400000	29003000	145150000
4	WT	Starved	47948000000	10325000000	41077000	175370000
5	WT	Starved	60408000000	15555000000	44106000	246630000
6	WT	Starved	48352000000	11341000000	28255000	175880000
7	ΔCC	Fed	16783000000	2782800000	13021000	762730000
8	ΔCC	Fed	15910000000	1486100000	12085000	504100000
9	ΔCC	Fed	29041000000	6291600000	13048000	1565500000
10	ΔCC	Starved	29766000000	6888300000	4077900	1345800000
11	ΔCC	Starved	24837000000	3229100000	3712200	827520000
12	ΔCC	Starved	24736000000	4359800000	11011000	1147900000
Mean SMCR8 WT Fed			5.00433e+10	11540000000	3.47507e+07	2.01093e+08
Mean SMCR8 ΔCC Fed			20578000000	3.52017e+09	12718000	944110000
2. LFQ normalized to Mean SMCR8 WT Fed / Mean SMCR8 ΔCC Fed
Samples	SMCR8	Condition	Gene
			SMCR8	C9orf72	FIP200	WDR41
1	WT	Fed	1.48543	1.98406	1.14217	1.98316
2	WT	Fed	0.696237	0.455251	1.02323	0.295037
3	WT	Fed	0.818331	0.560693	0.834603	0.721804
4	WT	Starved	0.95813	0.894714	1.18205	0.872083
5	WT	Starved	1.20711	1.34792	1.26921	1.22645
6	WT	Starved	0.966203	0.982756	0.813078	0.874619
7	ΔCC	Fed	0.81558	0.790531	1.02382	0.807883
8	ΔCC	Fed	0.773156	0.422168	0.950228	0.533942
9	ΔCC	Fed	1.41126	1.7873	1.02595	1.65818
10	ΔCC	Starved	1.4465	1.95681	0.32064	1.42547
11	ΔCC	Starved	1.20697	0.917315	0.291886	0.876508
12	ΔCC	Starved	1.20206	1.23852	0.865781	1.21585
3. Mean of normalized LFQ with corresponding standard error
Mean and standard error of SMCR8, C9orf72, FIP200 was used for Fig 5D.
Gene	SMCR8	Condition	Mean	Standard error
SMCR8	WT	Fed	1	0.200256
SMCR8	WT	Starved	1.04382	0.0666935
SMCR8	ΔCC	Fed	1	0.168196
SMCR8	ΔCC	Starved	1.28518	0.0658692
C9orf72	WT	Fed	1	0.402507
C9orf72	WT	Starved	1.07513	0.113283
C9orf72	ΔCC	Fed	1	0.332935
C9orf72	ΔCC	Starved	1.37088	0.2509
FIP200	WT	Fed	1	0.073111
FIP200	WT	Starved	1.08811	0.114147
FIP200	ΔCC	Fed	1	0.0203255
FIP200	ΔCC	Starved	0.492769	0.152432
WDR41	WT	Fed	1	0.413786
WDR41	WT	Starved	0.991049	0.0961021
WDR41	ΔCC	Fed	1	0.276348
WDR41	ΔCC	Starved	1.17261	0.13059

## Sheet: Fig 5E, Fig S10
S2 Data: Quantification of SMCR8, C9orf72, WDR41 and FIP200 proteins by mass spectrometry used for Fig 5D, E and S10 Fig.
1. LFQ intensities
Samples	SMCR8	Condition	Gene
			SMCR8	C9orf72	FIP200	WDR41
1	WT	Fed	74336000000	22896000000	39691000	398800000
2	WT	Fed	34842000000	5253600000	35558000	59330000
3	WT	Fed	40952000000	6470400000	29003000	145150000
4	WT	Starved	47948000000	10325000000	41077000	175370000
5	WT	Starved	60408000000	15555000000	44106000	246630000
6	WT	Starved	48352000000	11341000000	28255000	175880000
7	ΔCC	Fed	16783000000	2782800000	13021000	762730000
8	ΔCC	Fed	15910000000	1486100000	12085000	504100000
9	ΔCC	Fed	29041000000	6291600000	13048000	1565500000
10	ΔCC	Starved	29766000000	6888300000	4077900	1345800000
11	ΔCC	Starved	24837000000	3229100000	3712200	827520000
12	ΔCC	Starved	24736000000	4359800000	11011000	1147900000
Mean SMCR8 WT Fed			5.00433e+10	11540000000	3.47507e+07	2.01093e+08
2. LFQ normalized to Mean SMCR8 WT Fed
Samples	SMCR8	Condition	Gene
			SMCR8	C9orf72	FIP200	WDR41
1	WT	Fed	1.48543	1.98406	1.14217	1.98316
2	WT	Fed	0.696237	0.455251	1.02323	0.295037
3	WT	Fed	0.818331	0.560693	0.834603	0.721804
4	WT	Starved	0.95813	0.894714	1.18205	0.872083
5	WT	Starved	1.20711	1.34792	1.26921	1.22645
6	WT	Starved	0.966203	0.982756	0.813078	0.874619
7	ΔCC	Fed	0.335369	0.241144	0.374698	3.79292
8	ΔCC	Fed	0.317924	0.128778	0.347763	2.5068
9	ΔCC	Fed	0.580317	0.545199	0.375475	7.78494
10	ΔCC	Starved	0.594805	0.596906	0.117347	6.69241
11	ΔCC	Starved	0.49631	0.279818	0.106824	4.1151
12	ΔCC	Starved	0.494292	0.377799	0.316857	5.70829
3. Mean of normalized LFQ with corresponding standard error
Mean and standard error of WDR41 was used for Fig 5E.
Mean and standard error of SMCR8, C9orf72 and FIP200 were used in Fig S10.
Gene	SMCR8	Condition	Mean	Standard error
SMCR8	WT	Fed	1	0.200256
SMCR8	WT	Starved	1.04382	0.0666935
SMCR8	ΔCC	Fed	0.411204	0.0691626
SMCR8	ΔCC	Starved	0.528469	0.0270857
C9orf72	WT	Fed	1	0.402507
C9orf72	WT	Starved	1.07513	0.113283
C9orf72	ΔCC	Fed	0.30504	0.101559
C9orf72	ΔCC	Starved	0.418174	0.0765345
FIP200	WT	Fed	1	0.073111
FIP200	WT	Starved	1.08811	0.114147
FIP200	ΔCC	Fed	0.365979	0.00743869
FIP200	ΔCC	Starved	0.180343	0.0557869
WDR41	WT	Fed	1	0.413786
WDR41	WT	Starved	0.991049	0.0961021
WDR41	ΔCC	Fed	4.69488	1.29742
WDR41	ΔCC	Starved	5.50527	0.613106
